# Supplementary material for: Doxorubicin-Loaded Gold Nanoarchitectures as a Therapeutic Strategy against Diffuse Intrinsic Pontine Glioma
Source: MDPI journal article supplement (doi:10.3390/cancers13061278), 2021-03-13
Supplement: s1 [file s1]

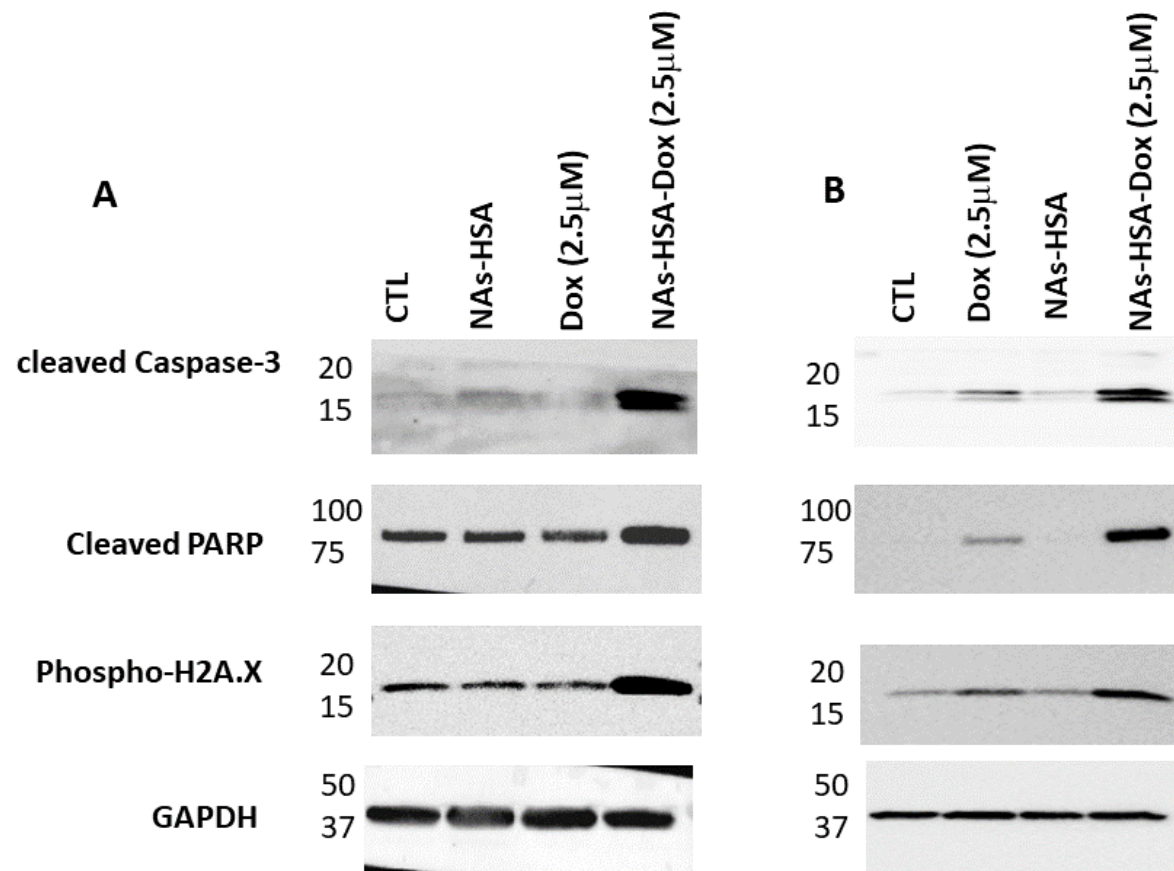

**Figure S1: NAs-HSA-Dox enhances apoptotic cell death in DIPG neurospheres;** Similarly to Figure 4 (A) HSJD-DIPG007 cells were treated with NAs-HSA-Dox and free Dox at the equivalent dose of 2.5  $\mu$ M for 24h; (B) RA055 cells were treated with NAs-HSA-Dox and free Dox at the equivalent dose of 2.5  $\mu$ M for 24h; Similarly to Figure 5 we observed increased levels of cleaved-caspase 3, cleaved-PARP and phospho-H2A.X in the NAs-HSA-Dox-treated cells.

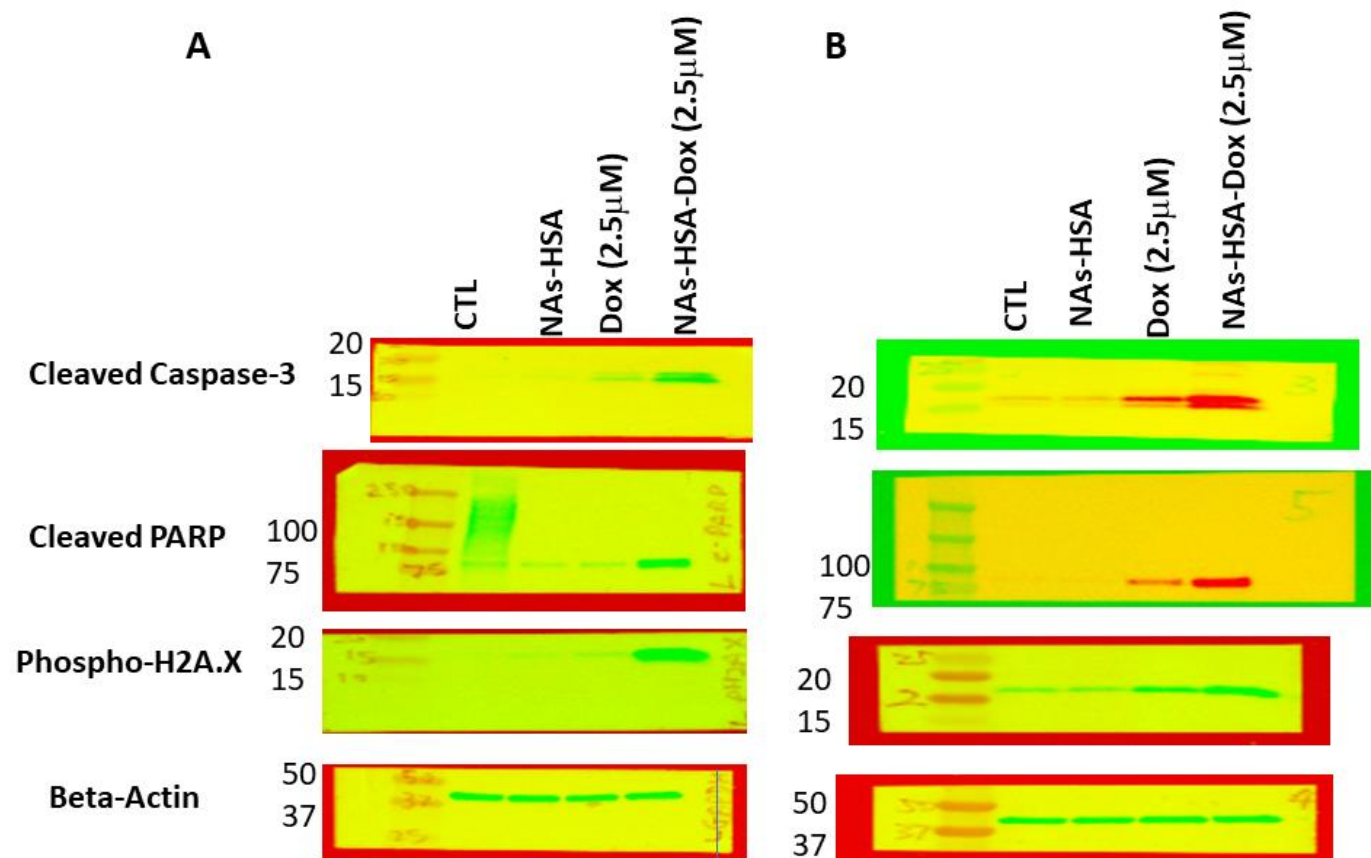

**Figure S2:** Original western blots for Figure 4.

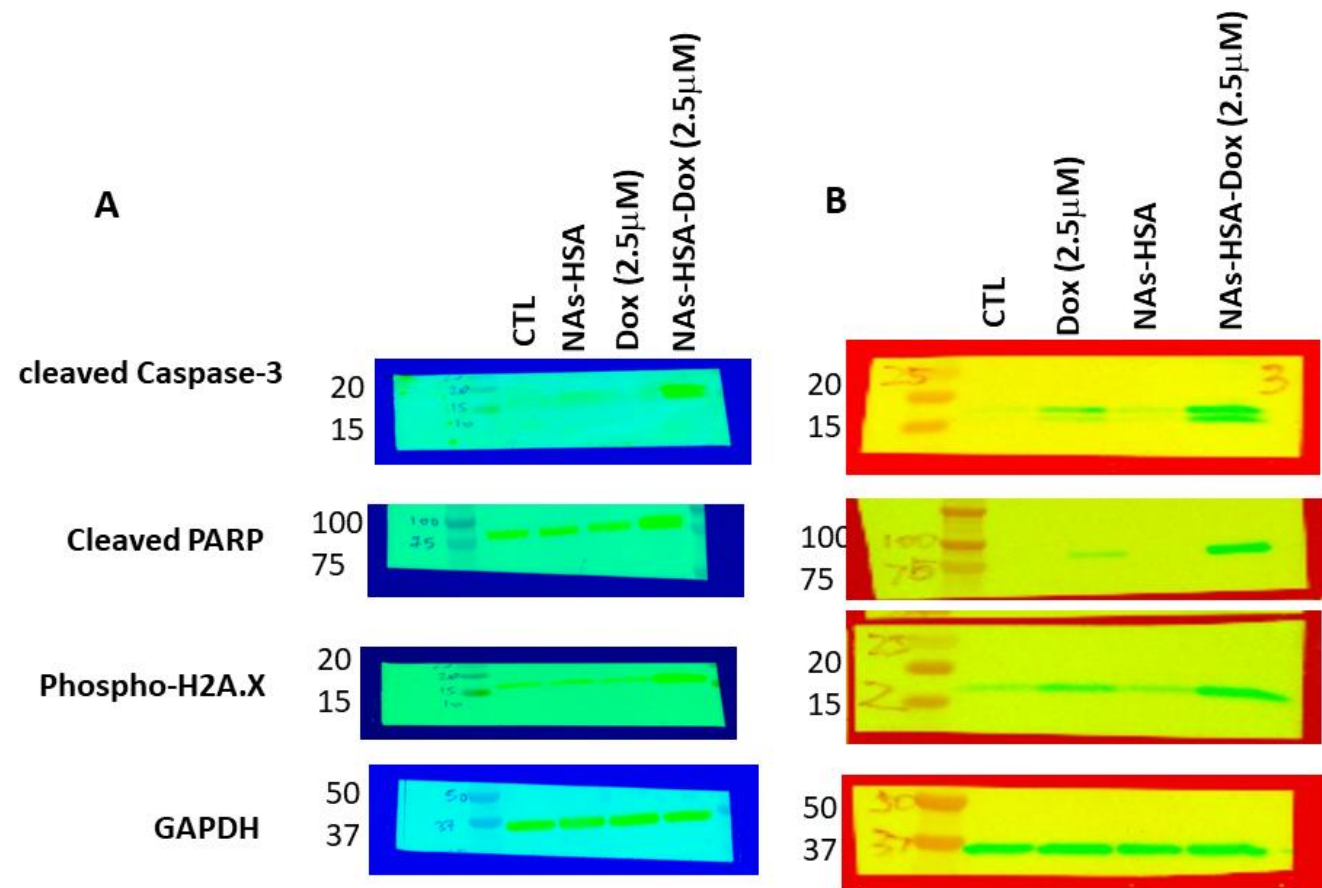

**Figure S3:** Original western blots for Figure S1.

**Table S1.** Kinetic parameters for DOX release obtained by applying the four kinetic models.

| Sample  | pH  | Zero order (Eq. 3) |                | First order (Eq. 4) |                | Ritger-Peppas (Eq. 5) |        |                | Peppas-Sahlin (Eq. 6) |                                   |                                |                |
|---------|-----|--------------------|----------------|---------------------|----------------|-----------------------|--------|----------------|-----------------------|-----------------------------------|--------------------------------|----------------|
|         |     | k                  | R <sup>2</sup> | k                   | R <sup>2</sup> | n                     | k      | R <sup>2</sup> | k <sub>1</sub>        | k <sub>2</sub> (10 <sup>2</sup> ) | K <sub>1</sub> /K <sub>2</sub> | R <sup>2</sup> |
| Nas-HSA | 7.4 | 0.2227             | 0.5785         | 0.0086              | 0.9114         | 0.3010                | 0.0716 | 0.9749         | 0.0318                | 0.04                              | 79.5                           | 0.9823         |
|         | 5.0 | 0.5107             | 0.4664         | 0.0118              | 0.9194         | 0.4495                | 0.0908 | 0.9433         | 0.0741                | 0.14                              | 52.9                           | 0.9790         |
| Nas     | 7.4 | 0.5296             | 0.1760         | 0.0335              | 0.9849         | 0.0854                | 0.4410 | 0.7699         | 0.0716                | 0.14                              | 51.1                           | 0.7715         |
|         | 5.0 | 0.6933             | 0.1464         | 0.0444              | 0.9922         | 0.0656                | 0.6399 | 0.8696         | 0.0915                | 0.18                              | 50.8                           | 0.6548         |
| Dox     | 7.4 | 0.5441             | 0.1946         | 0.0337              | 0.9866         | 0.0895                | 0.4464 | 0.8010         | 0.0731                | 0.15                              | 48.7                           | 0.7749         |
|         | 5.0 | 0.7213             | 0.1117         | 0.0457              | 0.9853         | 0.0587                | 0.6794 | 0.7155         | 0.0955                | 0.20                              | 47.8                           | 0.6622         |
